# Supplementary material
Source: PubMed Central journal article supplement (PMC10463170)

## Supplementary Online Content

Bretthauer M, Wieszczy P, Løberg M, et al. Estimated lifetime gained with cancer screening tests: a meta-analysis of randomized clinical trials. *JAMA Intern Med*. Published online August 28, 2023. doi:10.1001/jamainternmed.2023.3798

**eAppendix.** Search Terms and Strategies

**eTable.** Meta-Analysis of All-Cause Mortality for CT Screening for Lung Cancer in Smokers

This supplementary material has been provided by the authors to give readers additional information about their work.

## eAppendix. Search terms and strategies

Ovid MEDLINE

- 1 exp Breast Neoplasms/ 314948
- 2 ((breast\* or mammar\* or lobul\*) adj3 (neoplasm\* or tumo?r\* or cancer\* or carcinom\*)).mp. 447153
- 3 1 or 2 447153
- 4 exp Mammography/ 31546
- 5 (mammograph\* or xeromammograph\* or xero-mammograph\* or 3d-mammograph\* or tomosynthes\* or tomo-synthes\* or tomo synthes\* or xeroradiograph\* or xero-radiograph\* or xero radiograph\*).mp. 43202
- 6 4 or 5 43202
- 7 3 and 633515
- 8 exp Colorectal Neoplasms/ 216926
- 9 (((colorectal or colo-rectal or colon or colonic or rectum or rectal or anal or anus or colitis or colitis-associated or colitisassociated or sigmoid) adj3 (neoplasm\* or tumo?r\* or cancer\* or carcinom\*)) or adenomatous polyposis coli).mp. 292685
- 10 8 or 9 293117
- 11 Occult Blood/ 5907
- 12 (((f?ecal\* or f?eces) and (occult\* adj3 blood\*)) or fobt).mp. 5746
- 13 Sigmoidoscopy/ 4842
- 14 (sigmoidoscop\* or proctosigmoidoscop\* or procto-sigmoidoscop\*).mp. 7586
- 15 11 or 12 7953
- 16 13 or 14 7586
- 17 10 and 15 5829
- 18 10 and 16 3950
- 19 exp Prostatic Neoplasms/ 137167
- 20 (prostat\* adj3 (neoplasm\* or tumo?r\* or cancer\* or carcinom\*)).mp. 180149
- 21 19 or 20 180149
- 22 Prostate-Specific Antigen/ 27019
- 23 (PSA or prostate-specific antigen\* or prostate specific antigen\* or prostatespecific antigen\* or gamma-seminoprotein\* or gamma seminoprotein\* or gammaseminoprotein\* or (hk3 adj2 kallikrein) or semenogelase or seminin).mp. 55864

24 22 or 23 55864

25 21 and 24 40104

26 exp Lung Neoplasms/250553

27 ((lung or lungs or pulmonary) adj3 (neoplasm\* or tumor\* or cancer\* or carcinom\*)).mp. 321852

28 26 or 27 333634

29 Smoking/ or exp Pipe Smoking/ or exp Tobacco Smoking/ 149125

30 (smoke\* or smoking or cigarette\* or tobacco\* or cigar\*).mp. 413408

31 29 or 30 413408

32 exp Tomography, X-Ray Computed/464268

33 (((comput\* or electron beam) adj3 tomograph\*) or ((ct or cat scan\*) adj3 (x ray or x?ray or electron beam)) or (cine?ct or ((cine or ultrafast) adj3 ct))).mp. 657965

34 32 or 33 663956

35 28 and 31 and 34 2589

36 exp Mortality/409221

37 (mortalit\* or fatalit\* or fatal outcome\* or (cause\* adj2 death\*) or cfr or ((death\* or surviv\*) adj2 rate\*) or survival time or survival times).mp. 1602924

38 36 or 37 1602924

39 Randomized controlled trial.pt. 549606

40 exp randomized controlled trial/ 550927

41 (randomi#ed controlled trial\* or rct\*).mp. 792427

42 meta analysis.pt. 146050

43 meta-analysis/ 146050

44 (meta analysis or meta-analysis or metaanalysis).mp. 228316

45 systematic review.pt. 174923

46 "Systematic Review"/174923

47 systematic review.mp. 234729

48 or/39-47 1052220

49 7 and 38 and 48 639

50 17 and 38 and 48 290

51 18 and 38 and 48 186

52 25 and 38 and 48 1081

53 35 and 38 and 48 166  
54 or/49-53 2218

## Cochrane

#1 MeSH descriptor: [Breast Neoplasms] explode all trees 13916  
#2 ((breast\* or mammar\* or lobul\*) NEAR/3 (neoplasm\* or tumo?r\* or cancer\* or carcinom\*)):ti,ab,kw 40046  
#3 #1 OR #2 40046  
#4 MeSH descriptor: [Mammography] explode all trees 804  
#5 (mammograph\* or xeromammograph\* or xero-mammograph\* or 3d-mammograph\* or tomosynthes\* or tomo-synthes\* or tomo synthes\* or xeroradiograph\* or xero-radiograph\* or xero radiograph\*):ti,ab,kw 2476  
#6 #4 OR #5 2476  
#7 #3 AND #6 1979  
#8 MeSH descriptor: [Colorectal Neoplasms] explode all trees 8775  
#9 (((colorectal or colo-rectal or colon or colonic or rectum or rectal or anal or anus or colitis or colitis-associated or colitisassociated or sigmoid) NEAR/3 (neoplasm\* or tumo?r\* or cancer\* or carcinom\*)) or adenomatous polyposis coli):ti,ab,kw 23467  
#10 #8 OR #9 23467  
#11 MeSH descriptor: [Occult Blood] explode all trees 458  
#12 (((f?ecal\* or f?eces) and (occult\* NEAR/3 blood\*)) or fobt):ti,ab,kw 1112  
#13 MeSH descriptor: [Sigmoidoscopy] this term only 293  
#14 (sigmoidoscop\* or proctosigmoidoscop\* or procto-sigmoidoscop\*):ti,ab,kw 1138  
#15 #11 OR #12 1199  
#16 #13 OR #14 1138  
#17 #10 AND #15 928  
#18 #10 AND #16 540  
#19 MeSH descriptor: [Prostatic Neoplasms] explode all trees 5881  
#20 (prostat\* NEAR/3 (neoplasm\* or tumo?r\* or cancer\* or carcinom\*)):ti,ab,kw 15166  
#21 #19 OR #20 15166  
#22 MeSH descriptor: [Prostate-Specific Antigen] explode all trees 1344

#23 (PSA or prostate-specific antigen\* or prostate specific antigen\* or prostatespecific antigen\* or gamma-seminoprotein\* or gamma seminoprotein\* or gammaseminoprotein\* or (hk3 NEAR/2 kallikrein) or semenogelase or seminin):ti,ab,kw 9029

#24 #22 OR #23 9029

#25 #21 AND #24 5734

#26 MeSH descriptor: [Lung Neoplasms] explode all trees 8199

#27 ((lung or lungs or pulmonary) NEAR/3 (neoplasm\* or tumo?r\* or cancer\* or carcinom\*)):ti,ab,kw 24073

#28 #26 OR #27 24339

#29 MeSH descriptor: [Smoking] explode all trees 6368

#30 (smoke\* or smoking or cigarette\* or tobacco\* or cigar\*):ti,ab,kw 41567

#31 #29 OR #30 41567

#32 MeSH descriptor: [Tomography, X-Ray Computed] explode all trees 5276

#33 (((comput\* or electron beam) NEAR/3 tomograph\*) or ((ct or cat scan\*) NEAR/3 (x ray or x?ray or electron beam)) or (cine?ct or ((cine or ultrafast) NEAR/3 ct))):ti,ab,kw 25416

#34 #32 OR #33 25452

#35 #28 AND #31 AND #34 339

#36 MeSH descriptor: [Mortality] explode all trees 13735

#37 (mortalit\* or fatalit\* or fatal outcome\* or (cause\* NEAR/2 death\*) or cfr or ((death\* or surviv\*) NEAR/2 rate\*) or survival time or survival times):ti,ab,kw 151710

#38 #36 OR #37 151710

#39 #7 AND #38 553

#40 #17 AND #38 253

#41 #18 AND #38 186

#42 #25 AND #38 2161

#43 #35 AND #38 185

#44 {OR #39-#43} 3243

**eTable: Meta-analysis of all-cause mortality for CT screening for lung cancer in smokers**

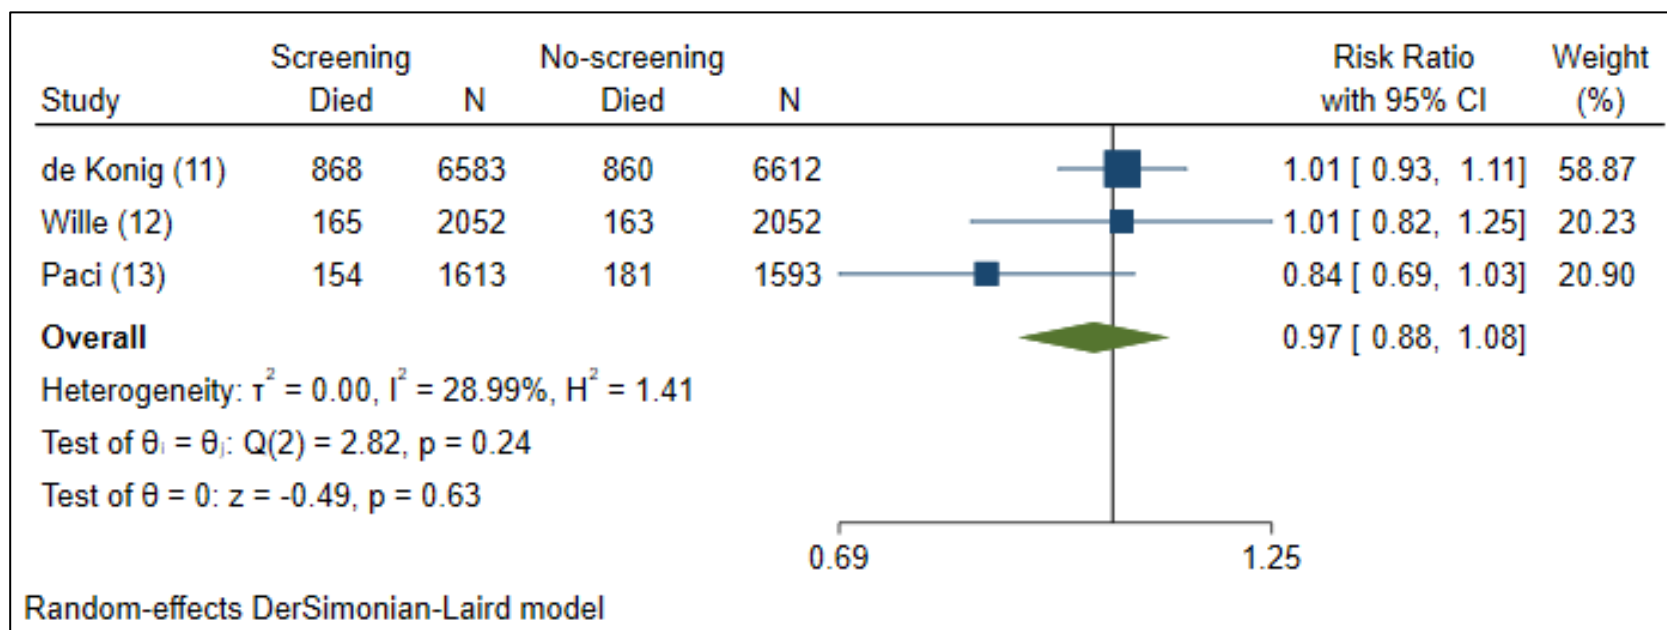

Supplement: jamainternmed-e233798-s001.pdf [file jamainternmed-e233798-s001.pdf]
