# Supplementary material
Source: PubMed Central journal article supplement (PMC10463170)
Supplement: jamainternmed-e233798-s002.pdf [file jamainternmed-e233798-s002.pdf]

## Data Sharing Statement

Bretthauer. Estimated Lifetime Gained With Cancer Screening Tests. *JAMA Intern Med.*  
Published August 28, 2023. doi:10.1001/jamainternmed.2023.3798

### Data

**Data available:** Yes

**Data types:** Data (not involving human participants)

**How to access data:** Data as used in the analyses and available from sources as published

**When available:** With publication

### Supporting Documents

**Document types:** None

### Additional Information

**Who can access the data:** Michael Bretthauer

**Types of analyses:** Specified purpose

**Mechanisms of data availability:** Without investigator support
